# Supplementary material for: Identification by the DArTseq method of the genetic origin of the Coffea canephora cultivated in Vietnam and Mexico
Source: PubMed Central journal article supplement (PMC5096298; doi:10.1186/s12870-016-0933-y), 2016-11-04

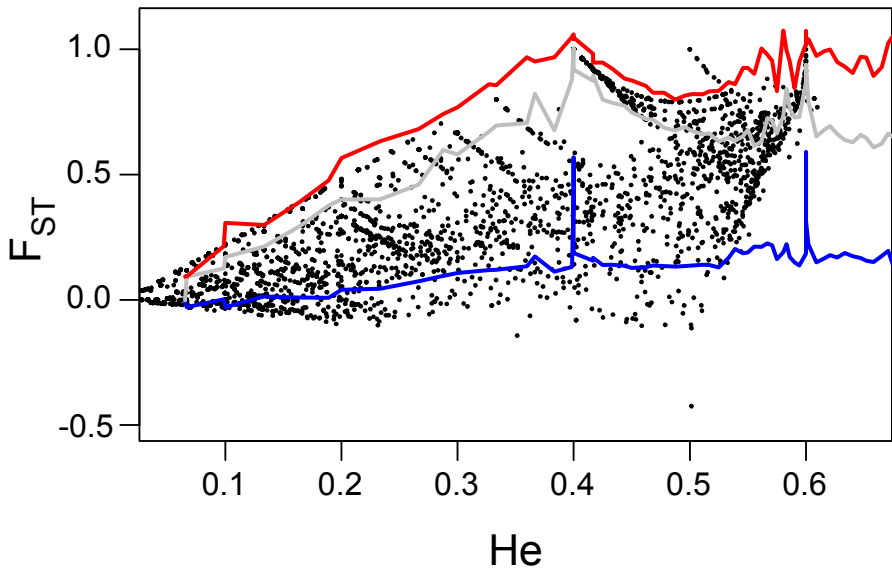

Supplement: 12870_2016_933_MOESM3_ESM.pdf [file 12870_2016_933_MOESM3_ESM.pdf]
